# Supplementary material for: Tar yield and composition from poultry litter gasification in a fluidised bed reactor: effects of equivalence ratio, temperature and limestone addition
Source: Royal Society of Chemistry journal article supplement (doi:10.1039/c9ra02548k), 2019-01-01
Supplement: c9ra02548k1.pdf [file c9ra02548k1.pdf]

## SUPPORTING INFORMATION

**Table S1:** Tabulated tar yields expressed as  $\text{g}_{\text{tar}} \text{kg}^{-1}$  poultry litter (d.a.f.)

|                    |                       | Poultry litter                        |           |          |               |         |         |               |              |                 |               |               |                          |
|--------------------|-----------------------|---------------------------------------|-----------|----------|---------------|---------|---------|---------------|--------------|-----------------|---------------|---------------|--------------------------|
| Process conditions | Duplicate measurement | Benzene†                              | Pyridine* | Toluene† | Benzonitrile* | Phenol* | Indene* | o/m/p-Cresol* | Naphthalene* | Acenaphthylene* | Phenanthrene* | Total tar SPA | Total tar SPA + micro GC |
| 700 °C/0.18        | 1                     | 7.43                                  | 0.282     | 3.87     | 0.334         | 0.328   | 0.275   | 0.717         | 0.407        | 0.078           | 0.057         | 5.346         | 16.646                   |
|                    | 2                     |                                       | 0.303     |          | 0.398         | 0.356   | 0.286   | 0.800         | 0.416        | 0.084           | 0.058         | 5.706         | 17.006                   |
| 700 °C/0.22        | 1                     | 10.46                                 | 0.348     | 5.78     | 0.610         | 0.282   | 0.387   | 0.806         | 0.509        | 0.101           | 0.076         | 7.454         | 23.694                   |
|                    | 2                     |                                       | 0.340     |          | 0.599         | 0.368   | 0.399   | 1.099         | 0.512        | 0.092           | 0.069         | 7.978         | 24.218                   |
| 700 °C/0.30        | 1                     | 10.19                                 | 0.493     | 5.95     | 0.592         | 0.430   | 0.452   | 1.176         | 0.601        | 0.109           | 0.090         | 9.339         | 25.579                   |
|                    | 2                     |                                       | /         |          | /             | /       | /       | /             | /            | /               | /             | /             | /                        |
|                    |                       | Poultry litter with 8 % w/w limestone |           |          |               |         |         |               |              |                 |               |               |                          |
| 700 °C/0.29        | 1                     | 10.97                                 | 0.380     | 5.26     | 0.508         | 0.394   | 0.362   | 0.878         | 0.540        | 0.105           | 0.068         | 7.569         | 23.799                   |
|                    | 2                     |                                       | 0.500     |          | 0.573         | 0.547   | 0.407   | 1.175         | 0.578        | 0.107           | 0.077         | 8.702         | 24.932                   |
| 700 °C/0.35        | 1                     | 9.30                                  | 0.450     | 5.07     | 0.544         | 0.561   | 0.459   | 1.221         | 0.566        | 0.108           | 0.082         | 10.294        | 24.664                   |
|                    | 2                     |                                       | 0.333     |          | 0.389         | 0.436   | 0.316   | 0.907         | 0.393        | 0.075           | 0.055         | 7.310         | 21.680                   |
| 700 °C/0.41        | 1                     | 8.30                                  | 0.131     | 4.30     | 0.142         | 0.431   | 0.090   | 0.373         | 0.159        | 0.026           | 0.019         | 3.050         | 15.650                   |
|                    | 2                     |                                       | 0.165     |          | 0.168         | 0.524   | 0.109   | 0.478         | 0.198        | 0.032           | 0.024         | 3.837         | 16.437                   |
| 750 °C/0.23        | 1                     | 15.24                                 | 0.768     | 5.58     | 0.451         | 0.363   | 0.749   | 0.218         | 1.449        | 0.310           | 0.212         | 9.209         | 30.029                   |
|                    | 2                     |                                       | 0.544     |          | 0.361         | 0.283   | 0.550   | 0.182         | 1.039        | 0.219           | 0.146         | 6.838         | 27.658                   |
| 750 °C/0.28        | 1                     | 12.63                                 | 0.444     | 5.20     | 0.181         | 0.287   | 0.406   | 0.146         | 0.634        | 0.117           | 0.073         | 4.595         | 22.425                   |
|                    | 2                     |                                       | 0.600     |          | 0.324         | 0.460   | 0.717   | 0.247         | 1.205        | 0.243           | 0.169         | 8.550         | 26.380                   |
| 750 °C/0.33        | 1                     | 12.00                                 | 0.545     | 5.12     | 0.233         | 0.485   | 0.432   | 0.186         | 0.825        | 0.147           | 0.100         | 6.628         | 23.748                   |
|                    | 2                     |                                       | 0.280     |          | 0.105         | 0.271   | 0.221   | 0.112         | 0.414        | 0.073           | 0.047         | 3.519         | 20.639                   |
| 800 °C/0.25        | 1                     | 18.30                                 | 0.571     | 4.35     | 0.146         | 0.171   | 0.430   | 0.041         | 1.344        | 0.291           | 0.193         | 5.290         | 27.940                   |
|                    | 2                     |                                       | 0.856     |          | 0.199         | 0.272   | 0.643   | 0.047         | 2.061        | 0.427           | 0.284         | 8.054         | 30.704                   |
| 800 °C/0.30        | 1                     | 16.08                                 | 0.429     | 4.44     | 0.090         | 0.172   | 0.243   | 0.021         | 1.025        | 0.196           | 0.126         | 4.117         | 24.637                   |
|                    | 2                     |                                       | 0.373     |          | 0.063         | 0.140   | 0.155   | 0.031         | 0.884        | 0.153           | 0.120         | 3.812         | 24.332                   |

† measured by on-line micro GC instrument; \* measured by off-line SPA method

/ Due to the damage of SPA sample during the shipment duplicate data concerning poultry litter 700 °C/0.30 is not available.

**Table S2:** Tabulated tar yields expressed as  $\text{g}_{\text{tar}} \text{m}^{-3}$  dry product gas

| Poultry litter                        |                       |                      |           |                      |               |         |         |               |              |                 |               |               |                          |
|---------------------------------------|-----------------------|----------------------|-----------|----------------------|---------------|---------|---------|---------------|--------------|-----------------|---------------|---------------|--------------------------|
| Process conditions                    | Duplicate measurement | Benzene <sup>†</sup> | Pyridine* | Toluene <sup>†</sup> | Benzonitrile* | Phenol* | Indene* | o/m/p-Cresol* | Naphthalene* | Acenaphthylene* | Phenanthrene* | Total tar SPA | Total tar SPA + micro GC |
| 700 °C/0.18                           | 1                     | 10.17                | 0.124     | 5.31                 | 0.147         | 0.144   | 0.121   | 0.316         | 0.179        | 0.034           | 0.025         | 2.355         | 17.837                   |
|                                       | 2                     |                      | 0.133     |                      | 0.175         | 0.157   | 0.126   | 0.352         | 0.183        | 0.037           | 0.026         | 2.514         | 17.995                   |
| 700 °C/0.22                           | 1                     | 9.97                 | 0.135     | 5.50                 | 0.237         | 0.110   | 0.151   | 0.314         | 0.198        | 0.039           | 0.030         | 3.248         | 18.718                   |
|                                       | 2                     |                      | 0.132     |                      | 0.233         | 0.143   | 0.155   | 0.428         | 0.199        | 0.036           | 0.027         | 3.104         | 18.573                   |
| 700 °C/0.30                           | 1                     | 9.18                 | 0.194     | 5.36                 | 0.233         | 0.169   | 0.178   | 0.463         | 0.237        | 0.043           | 0.035         | 3.677         | 18.214                   |
|                                       | 2                     |                      | /         |                      | /             | /       | /       | /             | /            | /               | /             | /             | /                        |
| Poultry litter with 8 % w/w limestone |                       |                      |           |                      |               |         |         |               |              |                 |               |               |                          |
| 700 °C/0.29                           | 1                     | 10.12                | 0.120     | 4.86                 | 0.160         | 0.124   | 0.114   | 0.277         | 0.170        | 0.033           | 0.022         | 2.388         | 17.361                   |
|                                       | 2                     |                      | 0.158     |                      | 0.181         | 0.172   | 0.128   | 0.371         | 0.182        | 0.034           | 0.024         | 2.745         | 17.718                   |
| 700 °C/0.35                           | 1                     | 8.48                 | 0.144     | 4.62                 | 0.174         | 0.180   | 0.147   | 0.391         | 0.181        | 0.034           | 0.026         | 3.299         | 16.405                   |
|                                       | 2                     |                      | 0.107     |                      | 0.125         | 0.140   | 0.101   | 0.291         | 0.126        | 0.024           | 0.018         | 2.343         | 15.448                   |
| 700 °C/0.41                           | 1                     | 8.41                 | 0.045     | 4.35                 | 0.048         | 0.146   | 0.030   | 0.126         | 0.054        | 0.009           | 0.006         | 1.034         | 13.799                   |
|                                       | 2                     |                      | 0.056     |                      | 0.057         | 0.178   | 0.037   | 0.162         | 0.067        | 0.011           | 0.008         | 1.303         | 14.068                   |
| 750 °C/0.23                           | 1                     | 13.74                | 0.277     | 5.03                 | 0.163         | 0.131   | 0.270   | 0.079         | 0.523        | 0.112           | 0.076         | 3.324         | 22.101                   |
|                                       | 2                     |                      | 0.196     |                      | 0.130         | 0.102   | 0.198   | 0.066         | 0.375        | 0.079           | 0.053         | 2.469         | 21.245                   |
| 750 °C/0.28                           | 1                     | 11.91                | 0.166     | 4.91                 | 0.068         | 0.107   | 0.151   | 0.054         | 0.237        | 0.044           | 0.027         | 1.715         | 18.534                   |
|                                       | 2                     |                      | 0.224     |                      | 0.121         | 0.172   | 0.267   | 0.092         | 0.450        | 0.091           | 0.063         | 3.190         | 20.010                   |
| 750 °C/0.33                           | 1                     | 11.11                | 0.206     | 4.74                 | 0.088         | 0.184   | 0.164   | 0.070         | 0.312        | 0.056           | 0.038         | 2.511         | 18.360                   |
|                                       | 2                     |                      | 0.106     |                      | 0.040         | 0.103   | 0.084   | 0.042         | 0.157        | 0.028           | 0.018         | 1.333         | 17.182                   |
| 800 °C/0.25                           | 1                     | 13.65                | 0.182     | 3.24                 | 0.047         | 0.054   | 0.137   | 0.013         | 0.429        | 0.093           | 0.062         | 1.690         | 18.588                   |
|                                       | 2                     |                      | 0.274     |                      | 0.063         | 0.087   | 0.205   | 0.015         | 0.658        | 0.136           | 0.091         | 2.573         | 19.471                   |
| 800 °C/0.30                           | 1                     | 13.40                | 0.146     | 3.70                 | 0.031         | 0.059   | 0.083   | 0.007         | 0.350        | 0.067           | 0.043         | 1.405         | 18.498                   |
|                                       | 2                     |                      | 0.127     |                      | 0.022         | 0.048   | 0.053   | 0.011         | 0.302        | 0.052           | 0.041         | 1.301         | 18.394                   |

<sup>†</sup> measured by on-line micro GC instrument; \* measured by off-line SPA method

/ Due to the damage of SPA samples during the shipment duplicate data concerning poultry litter 700 °C/0.30 is not available.
